# Supplementary material for: Tungsten-coated nano-boron carbide as a non-noble metal bifunctional electrocatalyst for oxygen evolution and hydrogen evolution reactions in alkaline media
Source: Royal Society of Chemistry journal article supplement (doi:10.1039/c7nr08092a), 2017-01-01
Supplement: c7nr08092a1.pdf [file c7nr08092a1.pdf]

## Electronic Supplementary Information

### **Tungsten coated nano boron carbide as a non-noble metal bifunctional electrocatalyst for oxygen evolution and hydrogen evolution reactions in alkaline media**

Yan Zhang, Yanhui Wang, Chan Han, Shaopei Jia, Shuyu Zhou and Jianbing Zang\*

*State Key Laboratory of Metastable Materials Science and Technology, College of Materials Science and Engineering, Yanshan University, Qinhuangdao 066004, PR China.*

---

\* Corresponding author. Tel./fax: +86 335 8387679. E-mail: diamondzjb@163.com.

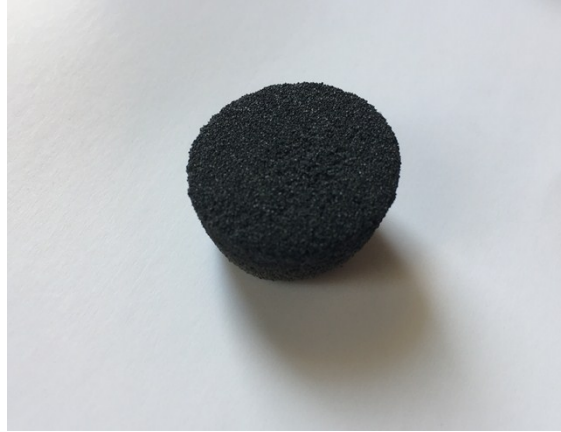

Fig. S1 Digital picture of the mixture ( $m_{\text{B4C}}/m_{\text{W}}=1:60$ ) after the discharge treatment at 870 °C for 40 min.

### ***Experimental section***

The potentials conversion from vs. Hg/HgO to vs. RHE is as follow:

$$E (\text{Hg/HgO (1M KOH)}) \text{ vs. } E (\text{RHE}) = 0.098 \text{ V}$$

$$E (\text{vs. RHE}) = E (\text{vs. Hg/HgO}) + 0.098 \text{ V} + (0.0591 \text{ V}) \text{ pH} = E (\text{vs. Hg/HgO}) + 0.8663 \text{ V}$$

The synthesis process of  $\text{RuO}_2$  was presented as follows: a solution of 5 ml of  $\text{RuCl}_3$  (0.05 M) and 100 ml deionized water was heated in water bath at 100 °C for 10 min under stirring. Then 1 ml KOH (1 M) was added into the above solution and stirred for 45 min. The suspension was centrifuged and washed by deionized water 3 times and dried at 80 °C for 5 h, leading to precipitation of  $\text{Ru(OH)}_2$ . Finally,  $\text{RuO}_2$  electrocatalyst was synthesized by heating of  $\text{Ru(OH)}_2$  under air condition at 300 °C for 3 h.

Microwave-assisted reduction method was used to acquire the 20 wt% Pt/C electrocatalysts: First, Vulcan XC-72 carbon black (20 mg) was mixed with 1 mL aqueous  $\text{H}_2\text{PtCl}_6$  solution (0.05 M) and 25 ml EG in a 100 ml beaker. After 30 min ultrasonic vibration, the beaker was put into the center of the microwave oven and heated for 60 s at 750 W. After cooling to room temperature, the resulting material was centrifuged and washed with acetone and deionized water 2 times, respectively. And the as-prepared electrocatalyst was dried in a vacuum oven at 100 °C for 24 h.

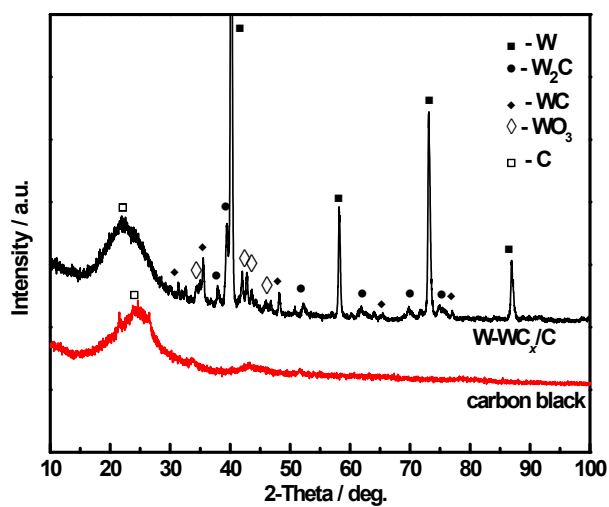

Fig. S2. XRD pattern of W-WC<sub>x</sub>/C and carbon black.

Table S1 Chemical composition of W-coated B<sub>4</sub>C.

|                   | B     | C     | O    | W    |
|-------------------|-------|-------|------|------|
| Peak area         | 6308  | 17142 | 1445 | 747  |
| Weight percentage | 43.68 | 49.92 | 3.45 | 2.95 |
| Atomic percentage | 47.86 | 49.22 | 2.55 | 0.36 |

Table S2 OER performance of some benchmark catalysts in alkaline solutions at 10 mA cm<sup>-2</sup>.

| Catalysts                 | Electrolyte | $\eta$ / mV | Reference |
|---------------------------|-------------|-------------|-----------|
| 20% Ir/C                  | 0.1 M KOH   | 380         | 3         |
| 20% Ru/C                  | 0.1 M KOH   | 390         | 3         |
| 20% IrO <sub>2</sub> /C   | 0.1 M KOH   | 470         | 4         |
| IrO <sub>2</sub>          | 0.1 M KOH   | 490         | 7         |
| RuO <sub>2</sub>          | 0.1 M KOH   | 350         | 31        |
| W-coated B <sub>4</sub> C | 0.1 M KOH   | 360         | This work |
